# Supplementary material
Source: PubMed Central journal article supplement (PMC2650231)
Supplement: NIHMS92170-supplement-01.pdf [file NIHMS92170-supplement-01.pdf]

## **SUPPLEMENTAL DATA**

### **Insights into MHC Class I Peptide Loading from the Structure of the Tapasin-ERp57**

#### **Thiol Oxidoreductase Heterodimer**

**Gang Dong, Pamela A. Wearsch, David R. Peaper, Peter Cresswell, and Karin M. Reinisch**

Table S1

Supplemental Figures S1-S3

Supplemental Experimental Procedures

| Table S1. Contacts in the tapasin/ERp57 complex*<br>between tapasin and ERp57 |                                                    |                                                  |                                                  |                                      |                                |                                                  |                                                  |
|-------------------------------------------------------------------------------|----------------------------------------------------|--------------------------------------------------|--------------------------------------------------|--------------------------------------|--------------------------------|--------------------------------------------------|--------------------------------------------------|
| residue/<br>atom in<br>tapasin                                                | residue/<br>atom in<br>ERp57                       | distance<br>(Å)<br>in 1 <sup>st</sup><br>complex | distance<br>(Å)<br>in 2 <sup>nd</sup><br>complex | residue/<br>atom in<br>ERp57         | residue/<br>atom in<br>tapasin | distance<br>(Å)<br>in 1 <sup>st</sup><br>complex | distance<br>(Å)<br>in 2 <sup>nd</sup><br>complex |
| Val77 C <sub>γ</sub> 1                                                        | Trp56 O                                            | 4.0                                              | 4.4                                              | Ala54 C <sub>β</sub>                 | Asp100 O <sub>δ</sub> 1        | 3.9                                              | 3.6                                              |
| Pro78 C <sub>γ</sub>                                                          | Trp56 C <sub>ζ</sub> 3                             | 3.7                                              | 3.7                                              | Trp56 O                              | Val77 C <sub>γ</sub> 1         | 4.0                                              | 4.4                                              |
| Gln93 N <sub>ε</sub> 2                                                        | His59 N <sub>ε</sub> 2                             | 3.4                                              | 3.4                                              | C <sub>ζ</sub> 3                     | Pro78 C <sub>γ</sub>           | 3.7                                              | 3.7                                              |
| Asn94 N                                                                       | His59 C <sub>ε</sub> 1                             | 3.8                                              | 3.3                                              | CH2                                  | Cys95 C <sub>β</sub>           | 3.6                                              | 3.5                                              |
| O <sub>δ</sub> 1                                                              | Gly99 C <sub>α</sub>                               | 3.7                                              | 3.9                                              | C <sub>ζ</sub> 2                     | Pro96 O                        | 3.6                                              | 3.4                                              |
| C <sub>β</sub>                                                                | Pro101 N                                           | 4.4                                              | 4.0                                              | C <sub>ζ</sub> 2                     | Leu99 O                        | 3.8                                              | 3.8                                              |
| Cys95 C <sub>β</sub>                                                          | Trp56 CH2                                          | 3.6                                              | 3.5                                              | N <sub>ε</sub> 1                     | Asp100 O <sub>δ</sub> 1        | 2.9                                              | 2.6                                              |
| S <sub>γ</sub>                                                                | Cys57 C <sub>α</sub>                               | 3.5                                              | 3.3                                              | Cys57 C <sub>α</sub>                 | Cys95 S <sub>γ</sub>           | 3.5                                              | 3.3                                              |
| S <sub>γ</sub>                                                                | Gly58 N                                            | 3.8                                              | 3.3                                              | Gly58 N                              | Cys95 S <sub>γ</sub>           | 3.8                                              | 3.3                                              |
| S <sub>γ</sub>                                                                | His59 N <sub>δ</sub> 1                             | 4.1                                              | 3.8                                              | His59 N <sub>ε</sub> 2               | Gln93 N <sub>ε</sub> 2         | 3.4                                              | 3.4                                              |
| O                                                                             | Ser98 O                                            | 3.8                                              | 4.3                                              | C <sub>ε</sub> 1                     | Asn94 N                        | 3.8                                              | 3.3                                              |
| O                                                                             | Gly99 C <sub>α</sub>                               | 3.1                                              | 3.2                                              | N <sub>δ</sub> 1                     | Cys95 S <sub>γ</sub>           | 4.1                                              | 3.8                                              |
| N                                                                             | Tyr100 O                                           | 2.8                                              | 2.7                                              | C <sub>ε</sub> 1                     | Tyr257 OH                      | 3.7                                              | 3.3                                              |
| Pro96 O                                                                       | Trp56 C <sub>ζ</sub> 2                             | 3.6                                              | 3.4                                              | Thr86 C <sub>γ</sub> 2               | Asp100 O <sub>δ</sub> 1        | 4.3                                              | 4.2                                              |
| C                                                                             | Ser98 O                                            | 3.8                                              | 3.7                                              | Thr89 C <sub>γ</sub> 2               | Arg97 NH2                      | 3.5                                              | 3.5                                              |
| Arg97 NH2                                                                     | Thr89 C <sub>γ</sub> 2                             | 3.5                                              | 3.5                                              | Cys92 C <sub>β</sub>                 | Arg97 NH2                      | 3.9                                              | 3.4                                              |
| NH2                                                                           | Cys92 C <sub>β</sub>                               | 3.9                                              | 3.4                                              | Asn93 N <sub>δ</sub> 2               | Arg97 NH1                      | 2.5                                              | 2.8                                              |
| NH1                                                                           | Asn93 N <sub>δ</sub> 2                             | 2.5                                              | 2.8                                              | Val97 O                              | Arg97 NH1                      | 3.0                                              | 2.9                                              |
| NH1                                                                           | Val97 O                                            | 3.0                                              | 2.9                                              | Ser98 O                              | Cys95 O                        | 3.8                                              | 4.3                                              |
| N                                                                             | Ser98 O                                            | 2.9                                              | 2.7                                              |                                      | Pro96 C                        | 3.8                                              | 3.7                                              |
| C <sub>γ</sub>                                                                | Tyr100 OH                                          | 3.2                                              | 2.7                                              |                                      | Arg97 N                        | 2.9                                              | 2.7                                              |
| Leu99 O                                                                       | Trp 56 C <sub>ζ</sub> 2                            | 3.8                                              | 3.8                                              | Gly99 C <sub>α</sub>                 | Asn94 O <sub>δ</sub> 1         | 3.7                                              | 3.9                                              |
| Asp100 O <sub>δ</sub> 1                                                       | Ala54 C <sub>β</sub>                               | 3.9                                              | 3.6                                              | Try100 O                             | Cys95 O                        | 3.1                                              | 3.2                                              |
| O <sub>δ</sub> 1                                                              | Trp56 N <sub>ε</sub> 1                             | 2.9                                              | 2.6                                              | OH                                   | Cys95 N                        | 2.8                                              | 2.7                                              |
| O <sub>δ</sub> 1                                                              | Thr86 C <sub>γ</sub> 2                             | 4.3                                              | 4.2                                              |                                      | Arg97 C <sub>γ</sub>           | 3.2                                              | 2.7                                              |
| O <sub>δ</sub> 2                                                              | Tyr100 OH                                          | 2.8                                              | 2.5                                              |                                      | Asp100 O <sub>δ</sub> 2        | 2.8                                              | 2.5                                              |
| Leu198 C <sub>δ</sub> 1                                                       | Trp405 O                                           | 3.9                                              | 3.7                                              | Pro101 N                             | Asn94 C <sub>β</sub>           | 4.4                                              | 4.0                                              |
| Ala199 O                                                                      | Trp405 C <sub>δ</sub> 1<br>Trp405 C <sub>γ</sub>   | 4.1                                              | 4.1                                              | Lys366 N <sub>ζ</sub>                | Gln207 N <sub>ε</sub> 2        | 2.8                                              | 3.3                                              |
| Ala 200 C <sub>β</sub>                                                        | Trp405 C <sub>δ</sub> 2<br>Trp405 C <sub>ε</sub> 3 | 3.6                                              | 3.3                                              | Pro404 O                             | Ala215 O                       | 4.4                                              | 4.1                                              |
| Pro202 C <sub>β</sub>                                                         | Trp405 CH2                                         | 4.3                                              | 4.4                                              |                                      | Val216 C <sub>γ</sub> 1        | 3.6                                              | 3.4                                              |
| Asn205 N <sub>δ</sub> 2                                                       | Val477 O                                           | 3.2                                              | 2.7                                              | Trp405 O                             | Leu198 C <sub>δ</sub> 1        | 3.9                                              | 3.7                                              |
| O <sub>δ</sub> 1                                                              | Phe450 C <sub>ζ</sub>                              | 3.9                                              | 3.9                                              | C <sub>δ</sub> 1<br>C <sub>γ</sub>   | Ala199 O                       | 4.1                                              | 4.1                                              |
| Gln207 N <sub>ε</sub> 2                                                       | Lys366 N <sub>ζ</sub>                              | 2.8                                              | 3.3                                              | C <sub>δ</sub> 2<br>C <sub>ε</sub> 3 | Ala200 C <sub>β</sub>          | 3.6                                              | 3.3                                              |
| N <sub>ε</sub> 2                                                              | Thr437 O                                           | 4.3                                              | 4.5                                              | CH2                                  | Pro202 C <sub>β</sub>          | 4.3                                              | 4.4                                              |
| Met208 C <sub>γ</sub>                                                         | Trp405 N <sub>ε</sub> 1                            | 4.4                                              | 4.4                                              | N <sub>ε</sub> 1                     | Met208 C <sub>γ</sub>          | 4.4                                              | 4.4                                              |
| Ala215 O                                                                      | Pro404 O                                           | 4.4                                              | 4.1                                              | O                                    | Val 216 C <sub>α</sub>         | 3.2                                              | 3.2                                              |
| Val216 C <sub>γ</sub> 1                                                       | Pro404 O                                           | 3.6                                              | 3.4                                              |                                      | Ala217 N                       | 2.9                                              | 2.8                                              |
| C <sub>α</sub>                                                                | Trp405 O                                           | 3.2                                              | 3.2                                              | Cys406 C                             | Val216 C <sub>β</sub>          | 4.1                                              | 4.1                                              |
| C <sub>β</sub>                                                                | Cys406 C                                           | 4.1                                              | 4.1                                              |                                      | Ala217 O                       | 3.9                                              | 3.7                                              |
| C <sub>γ</sub> 2                                                              | Gly407 C <sub>α</sub>                              | 3.6                                              | 3.7                                              | Gly407 C <sub>α</sub>                | Val216 C <sub>γ</sub> 2        | 3.6                                              | 3.7                                              |
| C <sub>γ</sub> 2                                                              | Lys410 C <sub>δ</sub>                              | 4.0                                              | 3.9                                              | N                                    | Ala217 O                       | 2.9                                              | 2.6                                              |
| Ala217 N                                                                      | Trp405 O                                           | 2.9                                              | 2.8                                              | C                                    | Phe218 C <sub>ε</sub> 1        | 3.6                                              | 3.3                                              |
| O                                                                             | Cys406 C                                           | 3.9                                              | 3.7                                              | O                                    | Trp237 C <sub>ζ</sub> 3        | 4.0                                              | 4.1                                              |
| O                                                                             | Gly407 N                                           | 2.9                                              | 2.6                                              | His408 C <sub>ε</sub> 1              | Phe218 C <sub>δ</sub> 1        | 3.6                                              | 3.5                                              |
| Phe218 C <sub>ε</sub> 1                                                       | Gly407 C                                           | 3.6                                              | 3.3                                              | N <sub>ε</sub> 2                     | NAG O6                         | 3.4                                              | 4.1                                              |
| C <sub>δ</sub> 1                                                              | His408 C <sub>ε</sub> 1                            | 3.6                                              | 3.5                                              | Lys410 C <sub>δ</sub>                | Val216 C <sub>γ</sub> 2        | 4.0                                              | 3.9                                              |
| C <sub>ε</sub> 1                                                              | Asn411 O <sub>δ</sub> 1                            | 3.7                                              | 3.2                                              | N <sub>ζ</sub>                       | Trp237 C <sub>ζ</sub> 2        | 3.5                                              | 3.0                                              |
| Trp237 C <sub>ζ</sub> 3                                                       | Gly407 O                                           | 4.0                                              | 4.1                                              |                                      | Pro239 C <sub>β</sub>          | 4.1                                              | 4.2                                              |
| C <sub>ζ</sub> 2                                                              | Lys410 N <sub>ζ</sub>                              | 3.5                                              | 3.0                                              | Asn411 O <sub>δ</sub> 1              | Phe218 C <sub>ε</sub> 1        | 3.7                                              | 3.2                                              |
| CH2                                                                           | Asn411 N <sub>δ</sub> 2                            | 3.1                                              | 3.2                                              | N <sub>δ</sub> 2                     | Trp237 CH2                     | 3.1                                              | 3.2                                              |
| Pro239 C <sub>β</sub>                                                         | Lys410 N <sub>ζ</sub>                              | 4.1                                              | 4.2                                              | Thr437 O                             | Gln207 N <sub>ε</sub> 2        | 4.3                                              | 4.5                                              |
| Tyr257 OH                                                                     | His59 C <sub>ε</sub> 1                             | 3.7                                              | 3.3                                              | Val 447 O                            | Ans205 N <sub>δ</sub> 2        | 3.2                                              | 2.7                                              |
| NAG O6                                                                        | His408 N <sub>ε</sub> 2                            | 3.4                                              | 4.1                                              | Phe450 C <sub>ζ</sub>                | Asn205 O <sub>δ</sub> 1        | 3.9                                              | 3.9                                              |

\*Distances were calculated for both tapasin/ERp57 complexes in the P2<sub>1</sub> crystal form. Interactions ≤ 4.5 Å present in both of the complexes are listed.

## Supplemental Figures

**Figure S1 Superpositions of tapasin-ERp57 complexes show flexibility between domains in both tapasin and ERp57.** There were two unique tapasinERp57 complexes in one crystal form (spacegroup  $P2_1$ , shown in yellow and blue) and one in the second crystal form ( $P2_12_12_1$ , shown in orange). **(A)** A superposition of the three complexes aligned using residues in the tapasin N-terminal domain shows flexibility between the tapasin N- and C-terminal domains. **(B)** Another view of the same three complexes, related to (A) by a  $90^\circ$  rotation about a vertical axis. While the tapasin-ERp57 interfaces are similar in all three complexes, there is flexibility between the four thioredoxin-like domains of ERp57. **(C)** Superpositions of ERp57 from the three different complexes, aligned using domain *b* show that there is flexibility between the ERp57 domains. **(D)** Superpositions of domains *bb'* from the tapasin-ERp57 complex structures and from structures of the ERp57 *bb'* domain alone (light, medium, and dark green; PDB ID 2H8L, see Kozlov et al., 2006).

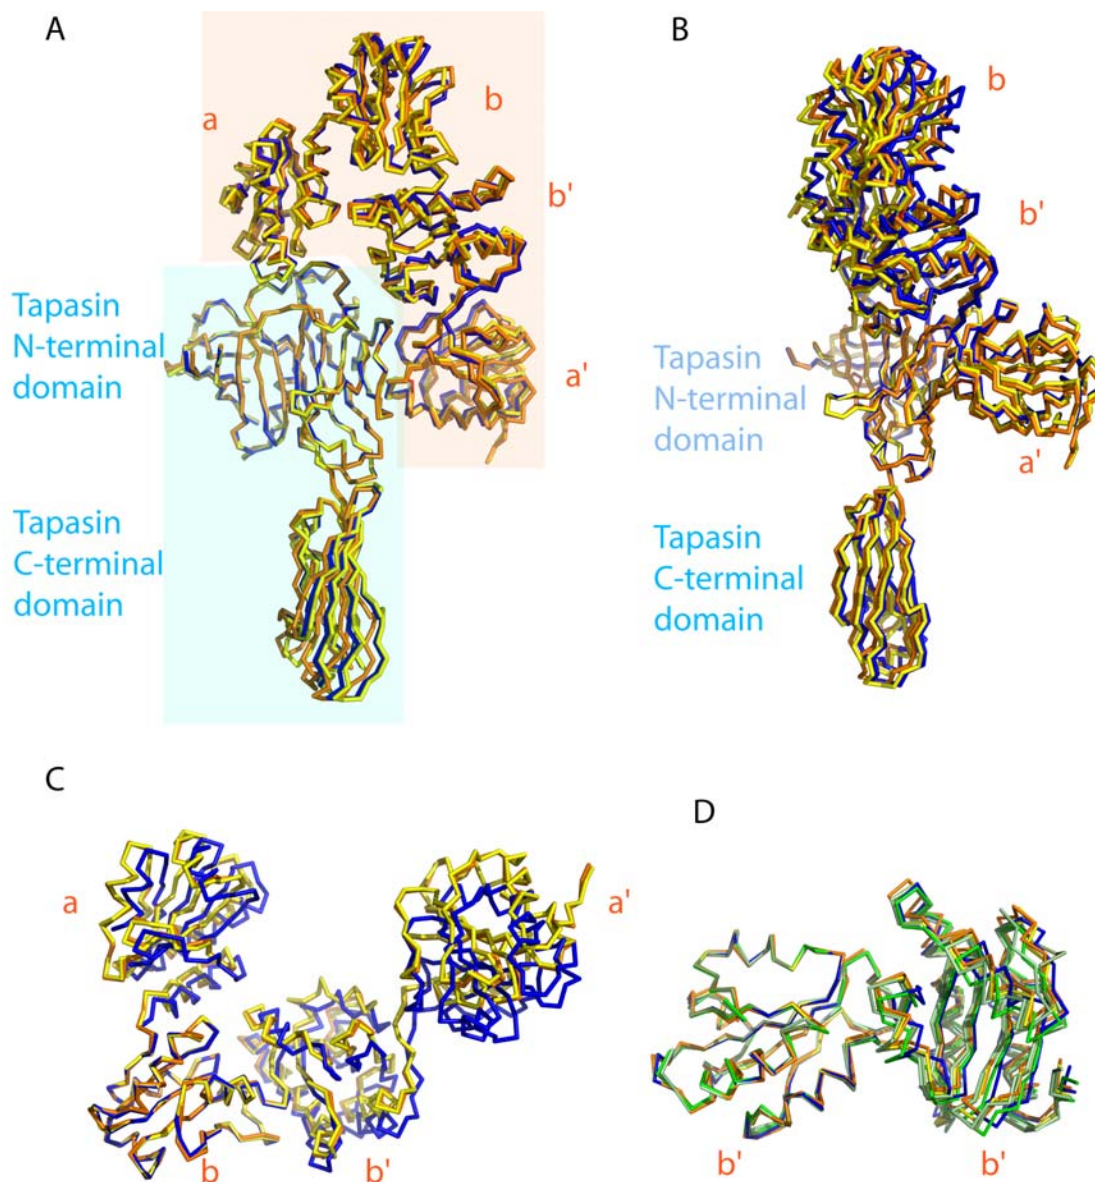

**Figure S2 All tapasin mutants form the conjugate with ERp57.** Pastal immunoprecipitation was performed using extracts of BV-infected Sf21 cells co-expressing the indicated tapasin mutants with C60A ERp57 followed by non-reducing SDS-PAGE and (A) Coomassie staining (~2 million cells/lane), (B) immunoblotting for the tapasin His<sub>6</sub> tag (~200,000 cells/lane using PentaHis Ab from Qiagen), (C) immunoblotting for ERp57 (~200,000 cells/lane using mAb MaP.ERp57). Extract preparation, immunoprecipitations, and immunoblotting were performed as described in the Methods. The predominant species expressed in insect cells was the tapasin-ERp57 conjugate (MW ~ 100 kDa) and a small percentage was isolated as free tapasin (~43 kDa).

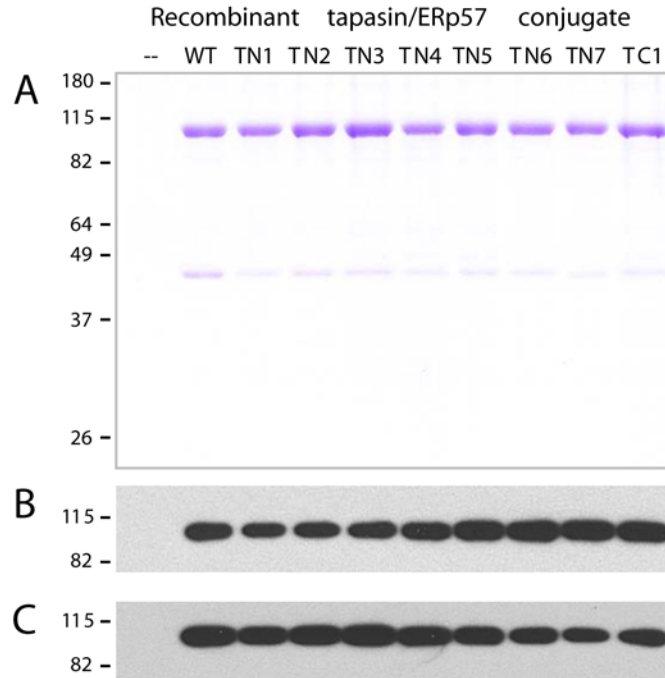

**Figure S3 Electron density maps contoured at 1.0 times the rms deviation of the map.** (A) Experimental phases were combined with phases from a partial model, for ERp57, and used in modeling tapasin. A region in the tapasin N-terminal domain is shown (in stereo). (B) A region in the C-terminal domain of tapasin in the same map. (C) A 2Fo-Fc composite omit map was calculated in CNS using an annealing temperature of 3000K. A portion of the N-terminal domain of tapasin is shown (in stereo). (D) A portion of domain *a* in ERp57 is shown in the same omit map.

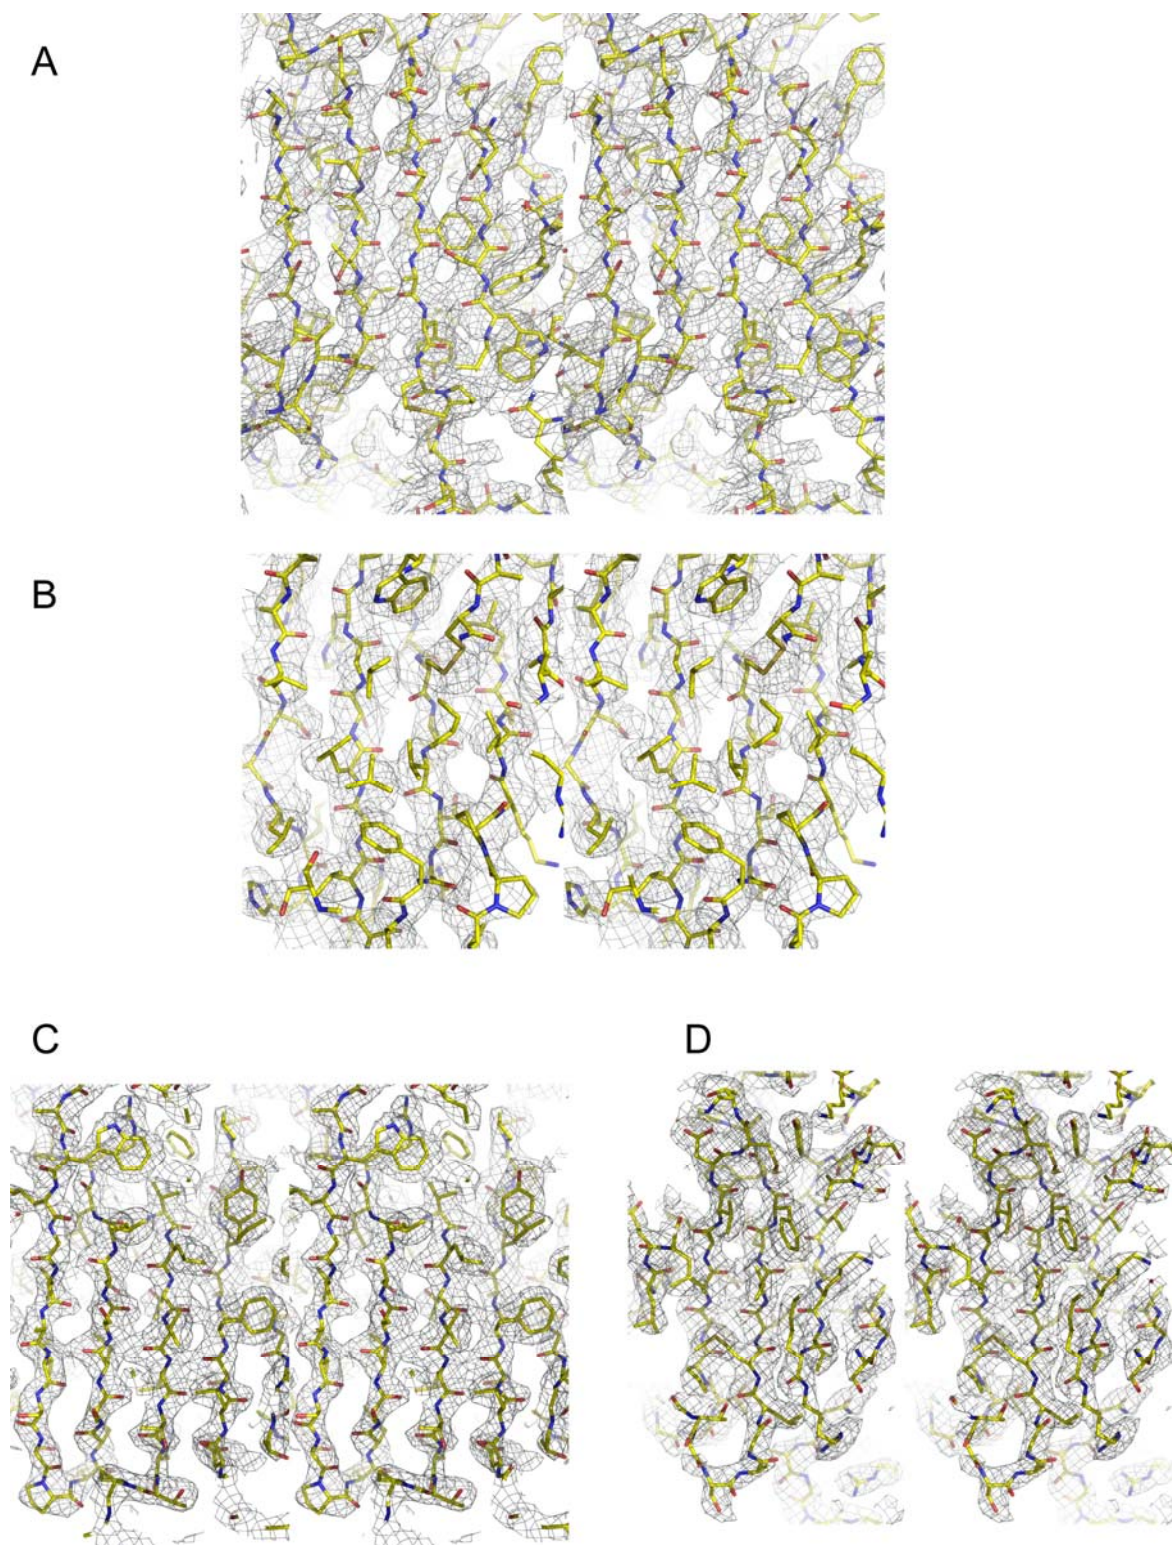

## **SUPPLEMENTAL EXPERIMENTAL PROCEDURES**

### **Cloning, expression, and isolation of recombinant tapasin mutants**

Mutants of soluble tapasin were generated using the QuikChange II XL Site-Directed Mutagenesis kit (Stratagene), cloned into the pFastBac Dual vector along with C60A ERp57, and confirmed by sequencing. Recombinant baculovirus was generated and amplified using Sf21 insect cells according to the manufacturer's instructions (Invitrogen). For protein production, small-scale infections were performed for the various mutants at MOI's ranging from 0.2-2 for 64-68 hr. All 8 tapasin mutants were stably expressed and conjugated to ERp57 with high efficiency (see Figure S2). Cell extracts were prepared as described (Wearsch and Cresswell, 2007) and incubated with A15m beads (BioRad) coupled to the tapasin-specific mAb PaSta1 (Dick et al., 2002) for 2 hr at a ratio of ~6  $\mu$ g of recombinant protein per 25  $\mu$ l of 50% bead slurry. The beads were washed 3x with 0.1% Triton X-100 in TBS (150 mM NaCl, 25 mM Tris-Cl, pH 7.4) and then 5x in TBS to remove the detergent. The advantage of this purification procedure is that PaSta1 is conformation-specific, thus ensuring that the isolated mutants were properly folded and stable. The amount of recombinant protein on the beads was quantitated by Sypro Orange (Molecular Probes) staining of SDS-PAGE gels according to the manufacturer's instructions using purified tapasin-ERp57 conjugate as a standard. The purified proteins immobilized on PaSta1 beads were used for experiments within 4 days to ensure optimal stability and activity.

### ***In vitro* MHC class I binding and peptide loading assays**

Both assays were performed as described (Wearsch and Cresswell, 2007) using extracts from .220.B\*0801 cells (Greenwood et al., 1994) with the exception that the recombinant

## **Immunity, Volume 30**

tapasin-ERp57 conjugates were immobilized on PaSta1 beads rather than free in solution. Immobilization had minimal, if any, effect on the ability of recombinant tapasin-ERp57 to interact with and load MHC class I molecules (data not shown). For the analysis of the MHC class I interaction, ~25  $\mu$ l of beads loaded with the various wild type and mutant tapasin conjugates were added at a final concentration of 250 nM to digitonin extracts from  $5 \times 10^6$  cells for 15 min at RT with mixing. The samples were then chilled and washed 4x with 0.1% digitonin in TBS. Samples were analyzed by SDS-PAGE and then subjected to immunoblotting with the MHC class I HC-specific Ab 3B10.7 (Lutz and Cresswell, 1987) as described (Wearsch and Cresswell, 2007). For peptide loading assays, 250 nM of immobilized conjugate was incubated with 1  $\mu$ M of [ $^{125}$ I]-NP(380-387L) peptide (which is specific for HLA-B8 binding) and extracts from  $5 \times 10^6$  cells for 45 min at RT. Following centrifugation for 5 min at 10,000xg to pellet the PaSta1 beads, supernatants were subjected to immunoprecipitation with the W6/32 Ab (Parham et al., 1979) which is specific for MHC class I heavy chain- $\beta_2m$  heterodimers. The amount of peptide bound was quantitated by gamma counting and the activity of the mutant tapasin-ERp57 conjugates was normalized to that observed with wild type tapasin.

### **Generation and analysis of transduced 721.220.B\*4402 cell lines**

Wild type and mutant tapasin were cloned into the pBMN-IRES-EGFP retroviral expression vector (Peaper and Cresswell, 2008) and all constructs were confirmed by sequencing. 721.220 cells expressing HLA-B\*4402 (Peh et al., 1998) were retrovirally transduced with wild type and mutant tapasin constructs by spinfection as described (Peaper and Cresswell, 2008). For FACS analysis,  $10^6$  transduced cells were stained with mouse anti-HLA-A,B,C or an isotype control directly coupled to APC (Becton Dickinson Clone #G46-2.6) in PBS with 1 mM EDTA, 0.05% FCS, and 0.02% azide according to the

## **Immunity, Volume 30**

manufacturer's instructions. Data was collected on a FACSCalibur (Becton Dickinson) and analyzed using FlowJo software (Treestar Inc.). The data presented in Figure 4C is gated for EGFP<sup>+</sup> cells. For analysis of the PLC in cells expressing wild type and mutant tapasin molecules,  $5 \times 10^6$  cells per sample were washed in MMTS, lysed in digitonin, subjected to immunoprecipitation with the PaSta1 mAb, and analyzed by non-reducing SDS-PAGE. Following transfer to Immobilon-P (Millipore), membranes were immunoblotted as described (Peaper and Cresswell, 2008) for MHC class I heavy chain and TAP using the 3B10.7 mAb (Lutz and Cresswell, 1987) and RING4.C polyclonal Ab (Meyer et al., 1994), respectively.

### **Analysis of the tapasin-ERp57 conjugate using mAb PaSta2**

The PaSta2 mAb was generated against soluble tapasin expressed in insect cells as part as the same mAb production used to generate PaSta1 (Dick et al., 2002). To evaluate their relative ability to bind MHC class I-associated tapasin, extracts from  $5 \times 10^6$  220.B\*0801 cells were supplemented with 100-300 nM recombinant WT tapasin-ERp57 conjugate and incubated for 15 min at RT. Samples were then immunoprecipitated with PaSta1 or PaSta2 coupled A15m beads and processed for immunoblotting against the MHC class I HC as described above. To screen the recombinant mutants for recognition by PaSta2,  $\sim 4 \times 10^6$  baculovirus-infected Sf21 cells were harvested and lysed as described (Wearsch and Cresswell, 2007). Immunoprecipitations were performed using PaSta1 or PaSta2 coupled beads and analyzed by non-reducing SDS-PAGE. The isolated recombinant proteins were detected by staining with Coomassie Blue.



**Supplemental References**

Dick, T. P., Bangia, N., Peaper, D. R., and Cresswell, P. (2002). Disulfide bond isomerization and the assembly of MHC class I-peptide complexes. *Immunity* 16, 87-98.

Greenwood, R., Shimizu, Y., Sekhon, G. S., and DeMars, R. (1994). Novel allele-specific, post-translational reduction in HLA class I surface expression in a mutant human B cell line. *J Immunol* 153, 5525-5536.

Lutz, P. M., and Cresswell, P. (1987). An epitope common to HLA class I and class II antigens, Ig light chains, and beta 2-microglobulin. *Immunogenetics* 25, 228-233.

Meyer, T. H., van Endert, P. M., Uebel, S., Ehring, B., and Tampe, R. (1994). Functional expression and purification of the ABC transporter complex associated with antigen processing (TAP) in insect cells. *FEBS Lett* 351, 443-447.

Parham, P., Barnstable, C. J., and Bodmer, W. F. (1979). Use of a monoclonal Ab (W6/32) in structural studies of HLA-A,B,C antigens. *J Immunol* 123, 342-349.

Peaper, D. R., and Cresswell, P. (2008). The redox activity of ERp57 is not essential for its functions in MHC class I peptide loading. *Proc Natl Acad Sci U S A* 105, 10477-10482.

Peh, C. A., Burrows, S. R., Barnden, M., Khanna, R., Cresswell, P., Moss, D. J., and McCluskey, J. (1998). HLA-B27-restricted antigen presentation in the absence of tapasin reveals polymorphism in mechanisms of HLA class I peptide loading. *Immunity* 8, 531-542.

Wearsch, P. A., and Cresswell, P. (2007). Selective loading of high-affinity peptides onto major histocompatibility complex class I molecules by the tapasin-ERp57 heterodimer. *Nat Immunol* 8, 873-881.
